# 1 **Pleiotropy drives repeatability in the genetic basis of adaptation**

2 Paul Battlay<sup>1</sup>, Sam Yeaman<sup>2</sup>, Kathryn A. Hodgins<sup>1</sup>

3 1. School of Biological Sciences, Monash University, Melbourne, Victoria, Australia

4 2. Department of Biological Sciences, University of Calgary, Calgary, Alberta, Canada

5

## 6 **Abstract**

7 Studies of trait-mapping and local adaptation often identify signatures of genetically parallel  
8 evolution, where different species evolve similar phenotypes using the same genes. Such  
9 patterns appear incongruent with current estimations of quantitative trait architecture. With  
10 hundreds or thousands of genes contributing to a trait, why would selection make repeated use  
11 of the same genes? Here, we use individual-based simulations to explore a two-patch model  
12 with quantitative, pleiotropic traits to understand the parameters which may lead to repeated use  
13 of a particular locus during independent bouts of adaptation. We find that repeatability can be  
14 driven by increased phenotypic effect size, a reduction in trait dimensionality and a reduction in  
15 mutational correlations at a particular locus relative to other loci in the genome, and that these  
16 patterns are magnified by increased migration between demes. These results suggest that  
17 evolutionary convergence can arise from multiple characteristics of a locus, and provide a  
18 framework for the interpretation of quantitative signatures of convergence in empirical studies.

19

20 **Keywords:** pleiotropy, parallel evolution, repeatability, migration, simulations

## 21 Introduction

22 Studies of adaptation commonly observe convergent genetic responses, where multiple species  
23 independently respond to a given selection pressure with mutations in orthologous genes.

24 These patterns imply a lack of redundancy in the genes available for a selective response, and  
25 at first glance seem inconsistent with another common observation: that variation in quantitative  
26 traits is explained by a very large number of alleles of small effect, which suggests a high level  
27 of redundancy in the genes contributing to quantitative traits.

28  
29 In the early 20th century, theoretical work by R. A. Fisher demonstrated that the continuous  
30 phenotypic variation observed in populations could be explained by a large number of alleles  
31 inherited in a Mendelian manner (Fisher 1918), and that selection would favor small-effect  
32 changes at large numbers of loci (Fisher 1930). Genome-wide association studies in humans  
33 have provided empirical observations of standing variation congruent to Fisher's models of  
34 adaptive trait architecture (reviewed in Visscher *et al.* 2017): Associations with hundreds or  
35 thousands of genetic variants explain only a modest proportion of trait heritability, with the  
36 remaining heritability attributable to even larger numbers of variants with effect sizes too small  
37 to detect with current cohorts (or possibly to rare variants that are excluded from many such  
38 analyses). But if variation in thousands of genes underpins a given trait, why would we ever  
39 observe orthologous genes contributing to adaptation in multiple species, when there are  
40 seemingly a myriad of ways to construct the same traits?

41  
42 In his revisiting of Fisher's model, Kimura (1968) demonstrated that although smaller effect  
43 mutations are more likely to be favourable, beneficial mutations of small effect are less likely to  
44 fix, as genetic drift biases the contribution of intermediate-effect loci to adaptation. Later, Orr  
45 (1998) showed that effect sizes of fixed adaptive mutations during an adaptive walk should be  
46 exponential, illustrating the importance of large-effect mutations early in bouts of adaptation to  
47 sudden environmental change. The omnigenic model (which posits that all genetic variants in  
48 genes expressed in the relevant cell type contribute to a phenotype; Boyle, Li & Pritchard 2017;  
49 Liu, Li & Pritchard 2019) also makes the distinction between 'core' genes of larger effect and  
50 'peripheral' genes of small effect (although the latter explains the bulk of trait heritability).

51 Perhaps the simplest explanation for convergent genetic adaptation is if alleles of large effect  
52 are disproportionately likely to contribute to adaptation (e.g., because of their fixation  
53 probabilities), but only a subset of loci are able to generate alleles of large effect (Orr 2005).

54 Convergence in gene use would then occur if there is long-term conservation of the genotype-

55 phenotype map and the potential for particular loci to generate alleles of large effect. Certainly,  
56 large-effect QTL have been identified in both experimental evolution studies (e.g. McKenzie &  
57 Batterham 1994) and natural populations (e.g. Shapiro *et al.* 2004; Doebly *et al.* 2004), and  
58 genomic footprints of selective sweeps (Smith & Haigh 1974; Kaplan, Hudson & Langley 1989)  
59 provide evidence for strong selection at individual loci. The effects of local adaptation on genetic  
60 architecture may further act to increase the likelihood of repeatability, as the contributions of  
61 small-effect alleles are disproportionately limited by the swamping effect of gene flow in  
62 populations connected by migration (Yeaman & Whitlock 2011). Consequently, convergence in  
63 the genetic basis of local adaptation is expected to frequently involve large-effect mutations,  
64 particularly when gene flow is high or drift is strong, yet these processes do not overwhelm  
65 selection (Yeaman *et al.* 2018).

66  
67 While alleles of large effect may be favoured early in adaptation or when there is migration-  
68 selection balance, their contribution to adaptation can be limited by pleiotropy.  
69 In both Fisher (1930) and Orr's models (1998), mutations are modelled as vectors in  
70 multidimensional phenotypic space; therefore mutations with a large effect in a favorable  
71 dimension generally deviate too far from the optima in other dimensions to increase overall  
72 fitness. Chevin, Martin & Lenormand (2010) expanded these models to incorporate distinct  
73 genes which could vary in their pleiotropic properties: specifically the number of traits that  
74 mutations would affect, and the correlation in effects of mutations on different traits (the latter  
75 being a property that can arise from organization of genes into networks; Hether & Hohenlohe  
76 2014). They demonstrated that repeatability in the genetics of adaptation is an expected  
77 consequence of between-locus variation in pleiotropy; convergence may therefore be observed  
78 in genes where negative pleiotropic effects are minimized.

79  
80 Neither local adaptation nor pleiotropy has been extensively studied in terms of their effects on  
81 repeatability, so if we are to interpret empirical observations of repeatability, we need a solid  
82 grounding in this theory. Here, we utilize individual-based simulations of quantitative trait  
83 evolution to understand how the interplay between inter-locus heterogeneity in pleiotropy and  
84 migration-selection balance affects genetic convergence. We build on previous models, which  
85 have considered adaptation in a single population following an environmental shift, by  
86 introducing a second population adapting to a divergent environment, allowing the observation  
87 of interactions between migration, effect size and pleiotropy in bouts of local adaptation. We  
88 find that increasing effect size or decreasing pleiotropy (both the overall dimensionality as well

89 as mutational correlation) at a given QTL relative to the other QTL will increase repeatability.  
90 Moreover we find that increased migration between demes exacerbates the repeatability  
91 observed.

## 92 Simulations

93 To study the factors driving repeatability at particular loci in independent bouts of adaptation, we  
94 used SLiM software (Haller & Messer 2019) to simulate adaptation to a complex environment  
95 that varied across two patches connected by migration. Adaptation within each patch was  
96 driven by selection on two (or more) traits:  $Z_i$  with an optimum that varied among the patches,  
97 and one or more (e.g.  $Z_j$ ) with the same optimum in each patch.

98

99 Traits could be affected by mutations at five genetically unlinked QTL, four QTL with uniform  
100 properties and a single QTL with aberrant properties: At one ‘focal’ QTL, parameter values  
101 could be varied independently of the ‘non-focal’ QTL. For some parameters, simulations were  
102 repeated with a total of 20 QTL and one focal QTL (fig. S3). Each QTL consisted of 500bp, and  
103 mutations occurred at a rate of  $1 \times 10^{-7}$ , resulting in an expected 10,000 mutations in each of two  
104 demes over the 20,000-generation simulation.

105

106 QTL mutations affected two or more phenotypes (e.g.  $Z_i$  and  $Z_j$ ); mutational effects for each QTL  
107 were drawn from a multivariate normal distribution where the variance was equal to the QTL  
108 effect magnitude and the covariance was equal to the QTL mutational correlation multiplied by  
109 the effect magnitude.

110

111 The following Gaussian function related individual fitness to phenotype:

112

$$e^{-\frac{(\theta - \Sigma a)^2}{2V_s}}$$

113

114 where  $\theta$  = the phenotypic optimum,  $\Sigma a$  = the sum of mutation effects, and  $V_s$  = the variance in  
115 the fitness function, reflecting the strength of stabilizing selection (set at 125 for all simulations).  
116 Overall individual fitness was calculated as the product of fitness values across all phenotypes,  
117 and there was no correlational selection between pairs of phenotypes.

118

119 We simulated two demes ( $d_1$  and  $d_2$ ), each composed of 1000 randomly-mating hermaphroditic  
120 individuals. Phenotypic space was unitless and provided a relative scaling of fitness vs  
121 mutational effect. Both demes began the simulation with phenotypic optima of 0 for all  
122 phenotypes and ran with a burn-in for 20,000 generations. After the burn-in, in  $d_1$  the optima for

123 all phenotypes remained at 0, while in  $d_2$ , the optimum for  $Z_i$  was shifted to -10, while other  
124 phenotypic optima remained at 0, and we tracked adaptive evolution over the following 20,000  
125 generations. We varied the migration rate between  $d_1$  and  $d_2$  (from 0 to 0.05) and the mutation  
126 effect magnitudes (from 0.1 to 5), mutational correlations (from 0 to 0.99), and the number of  
127 phenotypes affected at the QTL.

128

129 To interpret the results of each parameter combination, we calculated the genetic value (GV) of  
130 each mutation to a phenotype using the formula:

131

$$GV = (p_1 - p_2) \times a$$

132

133 where  $p_1$  and  $p_2$  are the frequencies of a mutation in each deme, and  $a$  is the size of the  
134 mutation's effect on  $Z_i$

135

136 We investigated three main ways in which the characteristics of the focal QTL could be  
137 differentiated from those of the other loci:

138 1) A change in effect magnitude by altering the variance component of the variance-  
139 covariance matrix used to generate mutations (fig. 1A cf. B). This parameter was  
140 used to model a large-effect QTL at the focal QTL.

141 2) A change in mutational correlation by altering the covariance component of the  
142 variance-covariance matrix (fig 1A cf. C). This parameter models dependence  
143 between phenotypes and determines the likelihood that a mutation's effect on one  
144 phenotype will have a corresponding effect on another.

145 3) A change in the number of phenotypes affected by a mutation by reducing the  
146 dimensionality of the variance-covariance matrix (fig. 1A cf. D). This models a  
147 situation where a QTL has no effect on one or more phenotypes..

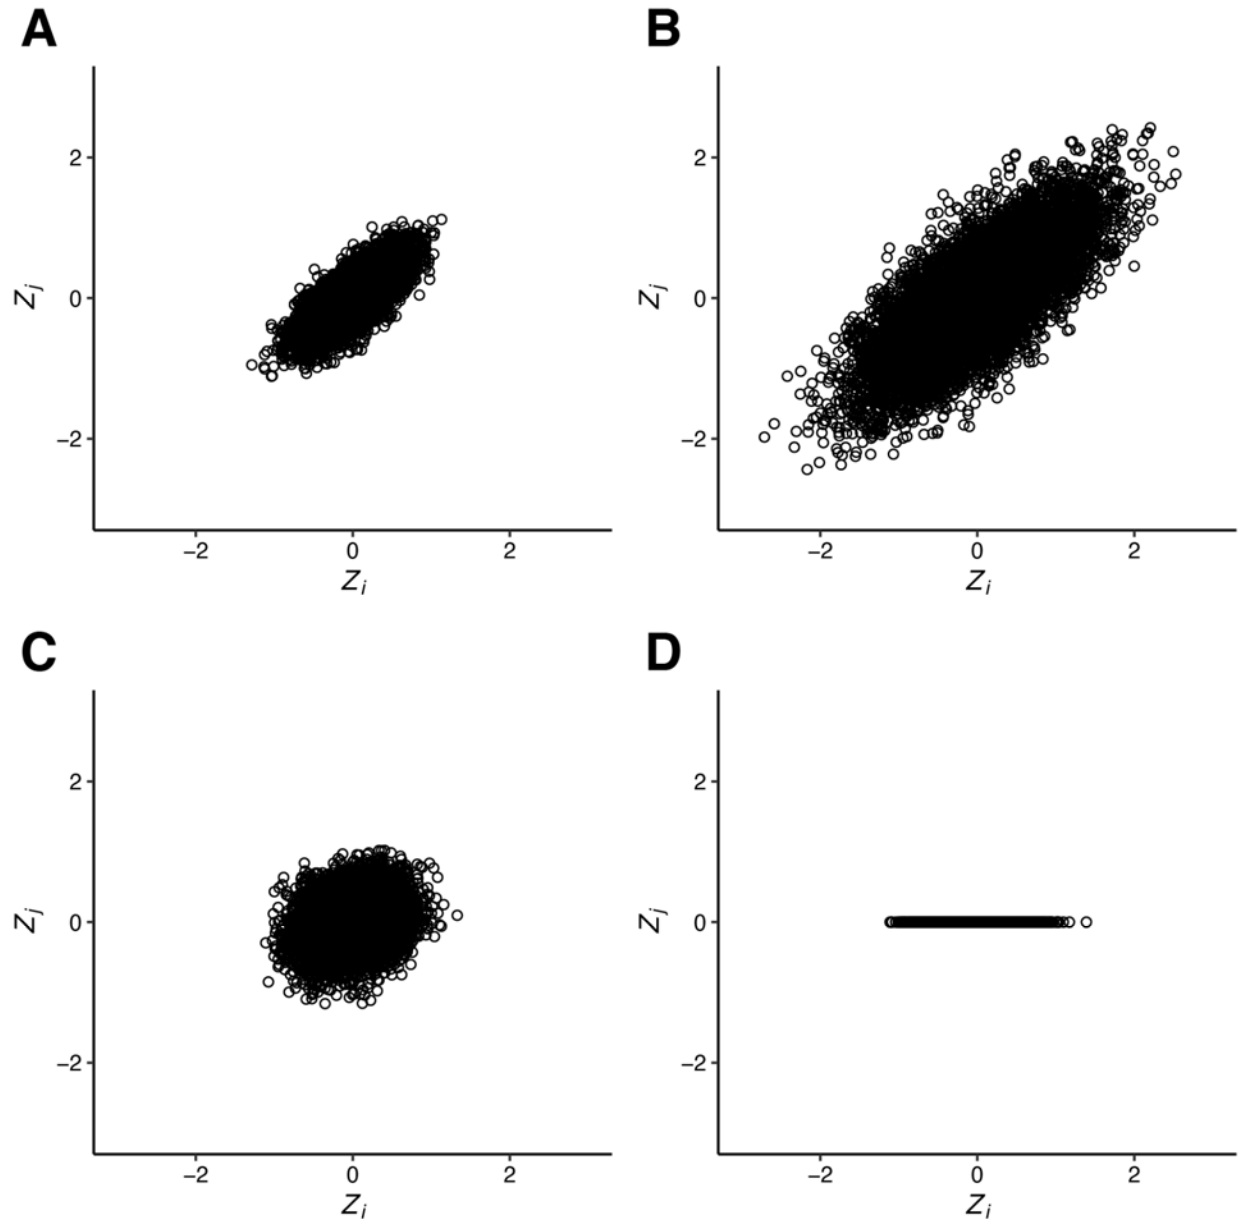

148

149 **Figure 1.** Effect sizes on  $Z_i$  (x-axes) and  $Z_j$  (y-axes) for 10,000 draws from distributions used to generate  
150 mutations. In A, the mean effect magnitude is 0.1 and the mutational correlation between traits is 0.75.

151 In B, the mutational correlation is the same as A (0.75) but the mean effect magnitude is increased to 0.5.

152 In C, the mean effect magnitude is the same as A (0.1), but the mutational correlation is relaxed to 0.25.

153 In D, mutations have no effect on the non-divergent phenotype.

154 For each parameter combination we quantified the divergence between demes  $d_1$  and  $d_2$  at the  
155 divergently selected phenotype by summing  $2 \times GV$  across all individuals, and quantified  
156 repeatability in the contributions of the QTL to trait divergence (measured by QTL-specific GV)  
157 across 100 replicates using the  $C_{chisq}$  statistic with 1000 permutations (Yeaman *et al.* 2018).  
158 Briefly,  $\chi^2$  was calculated across simulation replicates with:

$$\chi^2 = \frac{\sum (\underline{\alpha}_i - \underline{\alpha})^2}{\underline{\alpha}}$$

160  
161 where  $\underline{\alpha}_i$  is the sum across simulation replicates of GV for the  $i^{\text{th}}$  QTL, and  $\underline{\alpha}$  is the mean  $\underline{\alpha}$   
162 across all QTL.

163

164 The  $C_{chisq}$  statistic was then calculated by using  $\chi^2$  and  $\chi_{sim}^2$ , the results of 1000 permutations of  
165 the data within each replicate:

166

$$C_{chisq} = \frac{\chi^2 - \text{mean}(\chi_{sim}^2)}{\text{sd}(\chi_{sim}^2)}$$

167

168 By this equation, when  $C_{chisq} = 0$  we observe no excess repeatability, and complete repeatability  
169 is observed for five QTL when  $C_{chisq} = 2$ .

170

171 Additionally, we calculated  $GV_{focal} / GV_{non-focal}$ , the ratio of GV at the focal QTL to the mean GV  
172 across non-focal QTL.



## 173 **Results**

174 To model the case where the focal QTL is more important to the divergent phenotype than the  
175 non-focal QTL, we examined the effect of varying the effect magnitude at the focal QTL while  
176 holding effect magnitude constant at non-focal QTLs. The genes involved in adaptation are  
177 random ( $C_{chisq} = 0$ ) when all loci have the same mutation effect size and correlation (fig. 2 where  
178 focal QTL effect magnitude = 0.1). Increased repeatability was observed with any increase in  
179 focal QTL effect magnitude (fig. 2) across all mutational correlation and migration rate values.  
180 Additionally, increasing migration rates resulted in increasing repeatability (fig. 2; fig. S1), and  
181 this pattern was exacerbated by increasing mutational correlations.

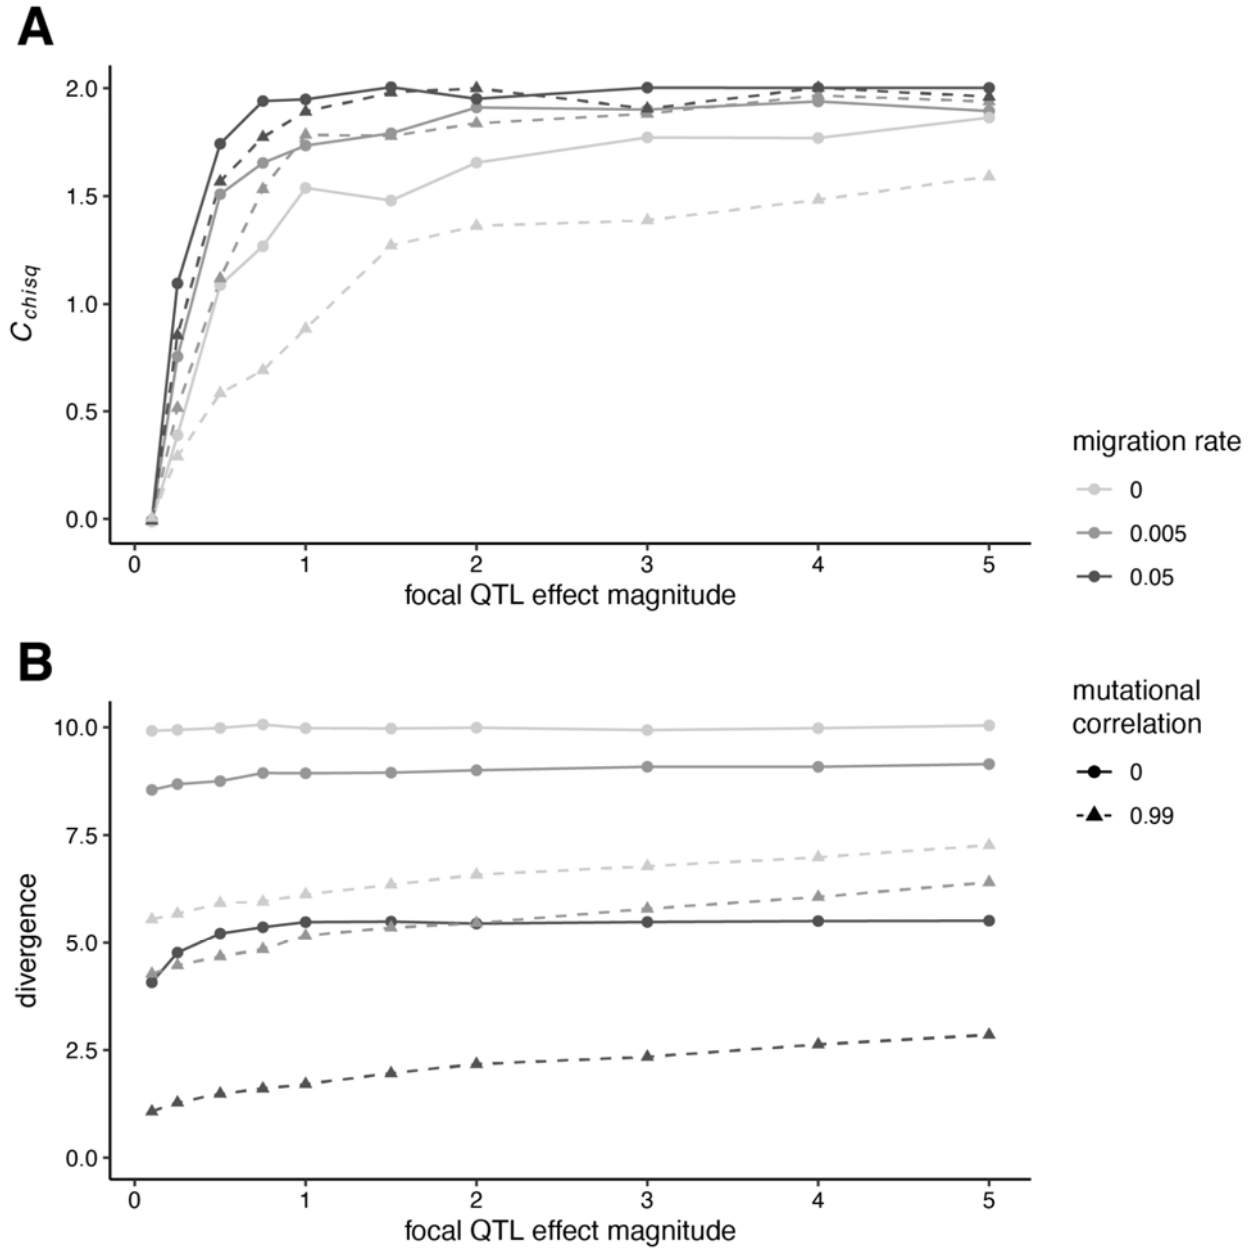

182

183 **Figure 2.** Repeatability ( $C_{chisq}$ ) in  $Z_i$  (A) and  $Z_i$  phenotypic divergence between  $d_i$  and  $d_j$  (B) against focal  
184 QTL effect magnitude where the effect magnitude for non-focal QTL is 0.1, and where mutational  
185 correlations between phenotypes at all QTL are 0 (circle points; solid lines) or 0.99 (triangle points;  
186 dashed lines). These simulations use two phenotypes (one divergent and one non-divergent), and were  
187 run for 20,000 generations.

188 Reducing the correlation in phenotypic effects at a QTL may also allow it to more readily acquire  
189 adaptive mutations when the direction of change toward the optimum is not aligned with the  
190 correlation in phenotypic effects. We modeled this by independently varying mutational  
191 correlations at the focal and non-focal QTL (fig. 3; fig. S2), and observed repeatability for  
192 mismatches between mutational correlation values (fig. 3). When the mutational correlation at  
193 the focal QTL was reduced relative to the non-focal QTL, repeatability involving the focal QTL  
194 increased, and when the mutational correlation at the focal QTL was increased relative to the  
195 non-focal QTL, repeatability involving the focal QTL decreased (this latter observation was not  
196 robust to an increase in the number of QTL [fig. S3]). High levels of repeatability were only  
197 seen when the focal QTL had a relaxed mutational correlation against a background of high  
198 mutational correlation at non-focal QTL (i.e. 0.75 and particularly 0.9). This reflects the fact that  
199 mutational correlations need to be high to significantly limit the availability of fortuitous  
200 combinations of effects on the phenotypes at the other QTL.

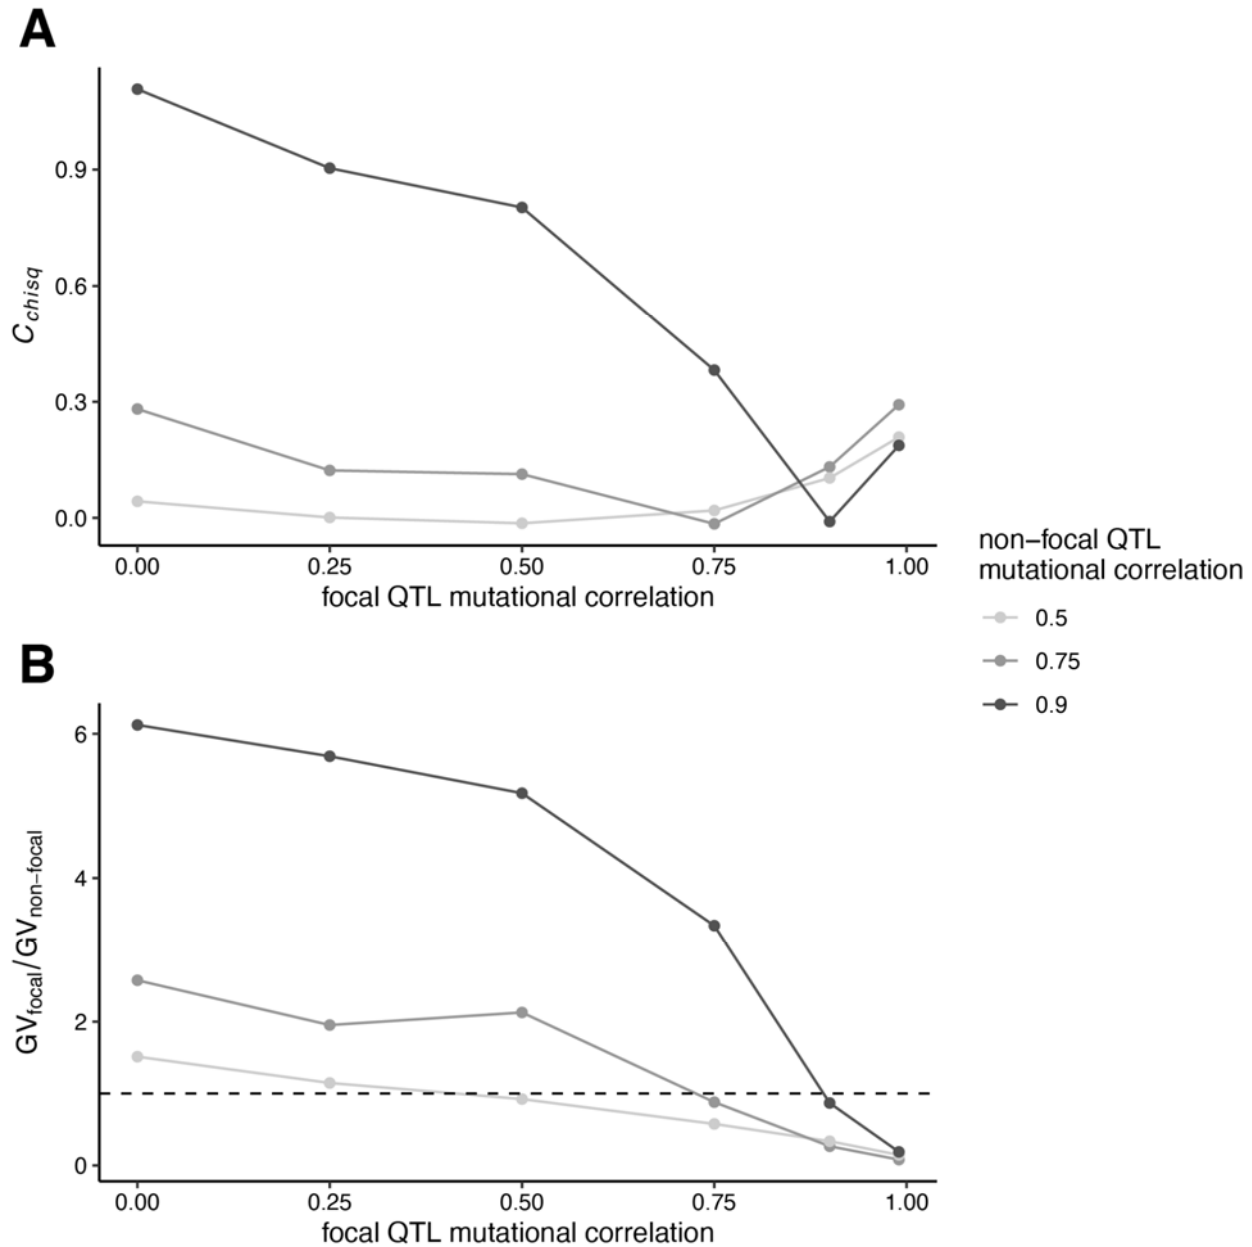

201

202 **Figure 3.** Repeatability ( $C_{chisq}$ ) in  $Z_i$  against focal QTL mutational correlation for varying values of non-  
203 focal QTL mutation correlation (A), and corresponding ratios of the GV at focal QTL to mean GV at non-  
204 focal QTL (B). The dotted line indicates  $GV_{focal}/GV_{non-focal} = 1$ , the point at which this value shifts from  
205 representing overuse of the focal QTL to underuse of the focal QTL. These simulations use a migration  
206 rate of 0.005, a mutation effect magnitude of 0.5 and two phenotypes (one divergent and one non-  
207 divergent), and were run for 20,000 generations.

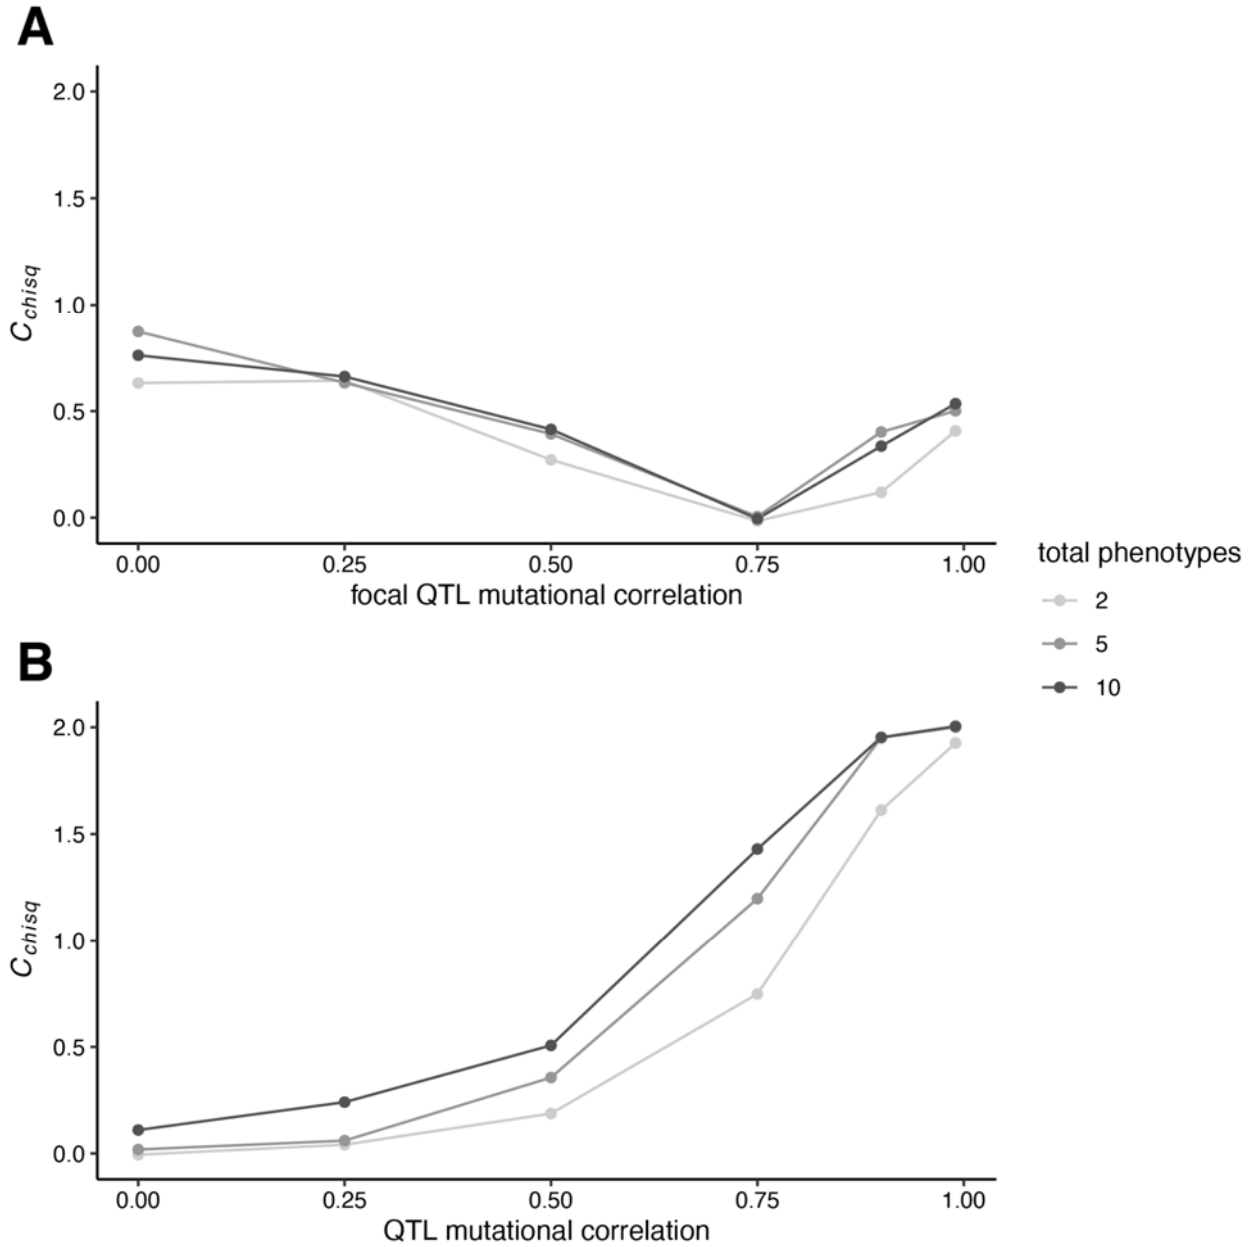

208

209 **Figure 4.** Repeatability ( $C_{chisq}$ ) against focal QTL mutational correlation where the non-focal QTL  
210 mutation correlation = 0.75 (A) and repeatability against QTL mutational correlation where the focal QTL  
211 affects the divergent phenotype ( $Z_i$ ) and one fewer non-divergent phenotypes than the non-focal QTL (B).  
212 Shades indicate the total number of phenotypes in the simulation (two with one non-divergent phenotype,  
213 five with four non-divergent phenotypes and ten with nine non-divergent phenotypes). These simulations  
214 use a migration rate of 0.005 and a mutation effect magnitude of 0.1, and were run for 20,000  
215 generations.

216 To assess how robust these observations were to an increase in the dimensionality of the  
217 model, we increased the number of non-divergent phenotypes from one to nine for the case  
218 where the non-focal QTL mutational correlation = 0.75, but saw only a very modest increase in  
219 repeatability (fig. 4A). Finally, we investigated the case where mutations at the focal QTL affect  
220 fewer phenotypes than the non-focal QTL. In the two-phenotype model, this meant focal QTL  
221 mutations would only affect the divergent phenotype; in the five and ten-phenotype models,  
222 focal QTL mutations affected the divergent phenotype and one fewer non-divergent phenotypes  
223 than non-focal QTL. With high mutational correlation between phenotypic effects, high levels of  
224 repeatability at the focal QTL is observed, however when mutational correlations are weak or  
225 absent, very little repeatability is observed (fig. 4B).

## 226 Discussion

227 Empirical observations of convergent genetic evolution are common (reviewed in Conte *et al.*  
228 2012), but in many ways at odds with some models of complex trait architecture. In this study  
229 we used simulations to understand the factors that could be varied at a QTL to produce  
230 convergent evolutionary patterns. Firstly, we demonstrated that an increase in effect magnitude  
231 of a QTL will produce patterns of repeatability, which is consistent with previous theoretical  
232 (Chevin, Martin & Lenormand 2010) and empirical observations (e.g. Rosenblum, Hoekstra, &  
233 Nachman 2004; Schlenke & Begun 2004). Both mutational correlations and migration can force  
234 adaptation away from phenotypic optima along ‘genetic lines of least resistance’ (Schluter 1996;  
235 Guillaume 2011). Correspondingly, we see a reduction in divergence between demes as  
236 mutational correlations or migration is increased (fig. 2B). However, while increasing mutational  
237 correlations reduce repeatability, migration amplifies it (fig. 2A).

238  
239 We also investigated how varying pleiotropy at the focal locus affected signatures of  
240 repeatability. Pleiotropy was varied in two ways: a relaxation in mutational correlations with a  
241 non-divergent phenotype, or a reduction in the number of phenotypes that a QTL mutation  
242 affects. Congruent with the findings of Chevin, Martin & Lenormand (2010), we found that  
243 variation in different forms of pleiotropy will increase the likelihood that repeatability will emerge.  
244 Specifically, we find that a reduction in pleiotropic dimensionality at a focal QTL produces  
245 greater levels of repeatability than a relaxation in mutational correlations, a pattern that is robust  
246 to increases in trait dimensionality in our models (fig. 4A c.f. B).

247  
248 Whereas Chevin, Martin & Lenormand (2010) used a single phenotype in a single deme under  
249 divergent selection, our simulations used two demes linked by varying amounts of migration.  
250 This models a common situation in local adaptation: Individuals in one population may  
251 experience local environmental shifts; they must therefore adapt to new optima for some  
252 phenotypes, while retaining existing optima at others. Previously, Yeaman & Whitlock (2011)  
253 demonstrated that migration concentrates the genetic architecture of local adaptation and favors  
254 alleles of larger effect. Correspondingly, we find that migration increases the observed  
255 repeatability arising from effect-magnitude variation (fig. 2, fig. S1), as high migration rates  
256 favour adaptation by larger effect alleles, which can most readily occur at the focal locus when  
257 pleiotropy is present. But this effect breaks down at high migration, where swamping tends to  
258 prevent persistent divergence. We also find that migration increases repeatability arising from  
259 pleiotropic variation (fig. S2). This is because the net effect of selection on a QTL is driving

260 repeatability. Under migration-selection balance those QTL with larger net beneficial effects  
261 (weaker mutational correlations) will be maintained as differentiated when there is migration  
262 (unless migration is so high that no mutations meet the threshold).

263

264 Guillaume (2011) utilized a similar two-patch design to investigate the effects of pleiotropy and  
265 migration on population divergence. He demonstrated that combinations of migration and  
266 pleiotropy can drive divergence between demes at phenotypes that share the same optima in  
267 both demes, as long as the phenotypes are sufficiently correlated with divergently selected  
268 phenotypes. We observe similar patterns in our simulations: Increasing levels of mutational  
269 correlations and migration reduce differentiation between demes at the divergent phenotype,  
270 and increase differentiation between demes at non-divergent phenotypes. Perhaps surprisingly,  
271 this reduced phenotypic differentiation does not necessarily limit genetic repeatability, as high  
272  $C_{chisq}$  values are observed in simulations where pleiotropy and migration have substantially  
273 limited the divergence between demes (fig. 2).

274

275 Our simulations make a number of assumptions that are almost certainly violated in natural  
276 populations exhibiting evolutionary convergence. Firstly, we assume complete orthology  
277 between QTL in replicates and that orthologous QTL retain corresponding effect magnitude and  
278 pleiotropic properties. In nature, divergence between species limits studies of convergence to  
279 the orthologous portions of their genomes and the effects of adaptation in non-orthologous  
280 regions has not been addressed here. Secondly, we have assumed that both the initial  
281 phenotypic optima (to which both demes start our simulations adapted) and the divergent  
282 phenotypic optima are identical. Related species adapting to similar environments will not share  
283 identical phenotypic optima, which is important for the interpretation of our results, as  
284 Thompson, Osmond & Schluter (2019) observed that repeatability declines rapidly as the angle  
285 between phenotypic optima increases, a pattern that is exacerbated by increased trait  
286 dimensionality. Furthermore variation between QTL in mutation rate, retention of standing  
287 variation and patterns of linkage disequilibrium may all affect the likelihood of repeatability, but  
288 we have held these parameters constant in our simulations.

289

290 The simulations presented here also use a simplified genome architecture: four QTL with  
291 uniform properties and a single QTL with aberrant properties, and between two and ten  
292 pleiotropic traits. This system pales in comparison to the thousands of genes (exhibiting near-  
293 global pleiotropy) which contribute to traits under the omnigenic model (Boyle, Li & Pritchard



294 2017; Liu, Li & Pritchard 2019). Contrastingly, a metaanalysis of gene knockout experiments in  
295 *Saccharomyces cerevisiae*, *Caenorhabditis elegans* and *Mus musculus* (Wang, Liao & Zhang  
296 2010) estimated pleiotropy to be far less pervasive: a median gene affects only one to nine  
297 percent of traits. Wang, Liao & Zhang (2010) also detected significant signals of modular  
298 pleiotropy (where subsets of genes affect subsets of traits), which would serve to simplify the  
299 architecture available for evolutionary convergence. Simple genetic architecture enhances  
300 repeatability at a genome-wide level, and this study demonstrates that an even more modular  
301 architecture at some QTL will act to further magnify repeatability. While the nature of  
302 pleiotropic, quantitative traits in higher organisms remains unresolved, we expect our simple  
303 model to be applicable to more complex architectures (Yeaman *et al.* 2018), and repeating our  
304 simulations on models with 20 QTL yields comparable results (fig. S3).

## 305 **References**

- 306 Boyle, E.A., Li, Y.I. and Pritchard, J.K., 2017. An expanded view of complex traits: from  
307 polygenic to omnigenic. *Cell*, 169(7), pp.1177-1186.  
308
- 309 Chevin, L.M., Martin, G. and Lenormand, T., 2010. Fisher's model and the genomics of  
310 adaptation: restricted pleiotropy, heterogenous mutation, and parallel evolution. *Evolution:  
311 International Journal of Organic Evolution*, 64(11), pp.3213-3231.  
312
- 313 Conte, G.L., Arnegard, M.E., Peichel, C.L. and Schluter, D., 2012. The probability of genetic  
314 parallelism and convergence in natural populations. *Proceedings of the Royal Society B:  
315 Biological Sciences*, 279(1749), pp.5039-5047.  
316
- 317 Doebley, J., 2004. The genetics of maize evolution. *Annu. Rev. Genet.*, 38, pp.37-59.  
318
- 319 Fisher, R.A., 1918. The correlation between relatives on the supposition of mendelian  
320 inheritance. *Transactions of the Royal Society of Edinburgh*, 52, pp 399-433.  
321
- 322 Fisher, R.A., 1930. *The Genetical Theory of Natural Selection*. The Clarendon Press.  
323
- 324 Haller, B.C. and Messer, P.W., 2019. SLiM 3: forward genetic simulations beyond the Wright–  
325 Fisher model. *Molecular biology and evolution*, 36(3), pp.632-637.  
326
- 327 Hether, T.D. and Hohenlohe, P.A., 2014. Genetic regulatory network motifs constrain adaptation  
328 through curvature in the landscape of mutational (co) variance. *Evolution*, 68(4), pp.950-964.  
329
- 330 Kaplan, N.L., Hudson, R.R. and Langley, C.H., 1989. The " hitchhiking effect" revisited.  
331 *Genetics*, 123(4), pp.887-899.  
332
- 333 Kimura, M., 1968. Evolutionary rate at the molecular level. *Nature*, 217(5129), pp.624-626.  
334
- 335 Liu, X., Li, Y.I. and Pritchard, J.K., 2019. Trans effects on gene expression can drive omnigenic  
336 inheritance. *Cell*, 177(4), pp.1022-1034.  
337

- 338 McKenzie, J.A. and Batterham, P., 1994. The genetic, molecular and phenotypic consequences  
339 of selection for insecticide resistance. *Trends in Ecology & Evolution*, 9(5), pp.166-169.  
340
- 341 Orr, H.A., 1998. The population genetics of adaptation: the distribution of factors fixed during  
342 adaptive evolution. *Evolution*, 52(4), pp.935-949.  
343
- 344 Orr, H.A., 2005. The probability of parallel evolution. *Evolution*, 59(1), pp.216-220.  
345
- 346 Rosenblum, E.B., Hoekstra, H.E. and Nachman, M.W., 2004. Adaptive reptile color variation  
347 and the evolution of the MC1R gene. *Evolution*, 58(8), pp.1794-1808.  
348
- 349 Schlenke, T.A. and Begun, D.J., 2004. Strong selective sweep associated with a transposon  
350 insertion in *Drosophila simulans*. *Proceedings of the National Academy of Sciences*, 101(6),  
351 pp.1626-1631.  
352
- 353 Schluter, D., 1996. Adaptive radiation along genetic lines of least resistance. *Evolution*, 50(5),  
354 pp.1766-1774.  
355
- 356 Shapiro, M.D., Marks, M.E., Peichel, C.L., Blackman, B.K., Nereng, K.S., Jónsson, B., Schluter,  
357 D. and Kingsley, D.M., 2004. Genetic and developmental basis of evolutionary pelvic reduction  
358 in threespine sticklebacks. *Nature*, 428(6984), pp.717-723.  
359
- 360 Smith, J.M. and Haigh, J., 1974. The hitch-hiking effect of a favourable gene. *Genetics*  
361 *Research*, 23(1), pp.23-35.  
362
- 363 Visscher, P.M., Wray, N.R., Zhang, Q., Sklar, P., McCarthy, M.I., Brown, M.A. and Yang, J.,  
364 2017. 10 years of GWAS discovery: biology, function, and translation. *The American Journal of*  
365 *Human Genetics*, 101(1), pp.5-22.  
366
- 367 Wang, Z., Liao, B. Y., & Zhang, J. (2010). Genomic patterns of pleiotropy and the evolution of  
368 complexity. *Proceedings of the National Academy of Sciences*, 107(42), 18034-18039.  
369
- 370 Yeaman, S. and Whitlock, M.C., 2011. The genetic architecture of adaptation under migration–  
371 selection balance. *Evolution: International Journal of Organic Evolution*, 65(7), pp.1897-1911.

372

373 Yeaman, S., Gerstein, A.C., Hodgins, K.A. and Whitlock, M.C., 2018. Quantifying how

374 constraints limit the diversity of viable routes to adaptation. *PLoS genetics*, 14(10), p.e1007717.

375 **Supplementary figures**

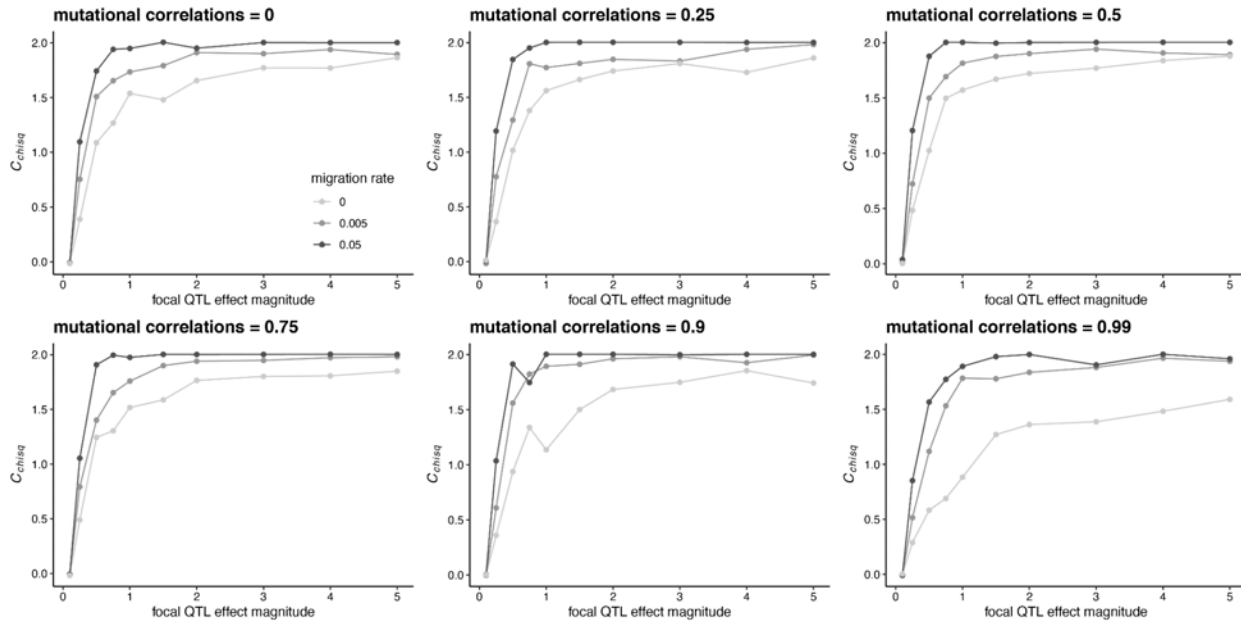

376

377 **Figure S1.** Repeatability ( $C_{chisq}$ ) in  $Z_i$  against focal QTL effect magnitude where the effect magnitude for  
378 non-focal QTL is 0.1. These simulations use two phenotypes (one divergent and one non-divergent), and  
379 were run for 20,000 generations.

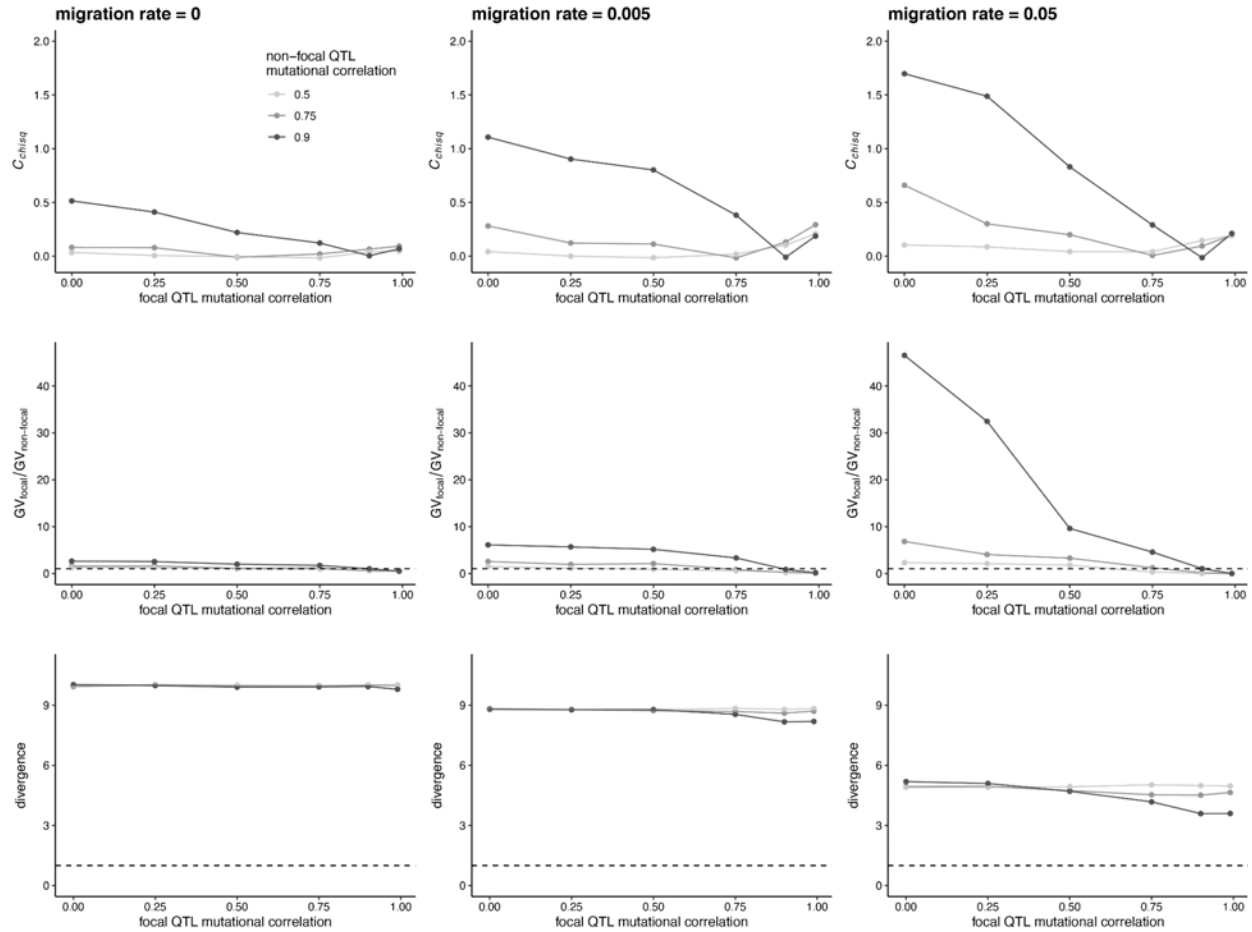

380

381 **Figure S2.** Repeatability ( $C_{chisq}$ ) in  $Z_i$  against focal QTL mutational correlation for varying values of non-  
382 focal QTL mutation correlation (top row), corresponding ratios of the GV at focal QTL to mean GV at non-  
383 focal QTL (middle row), and divergence between demes (bottom row). These simulations use a mutation  
384 effect magnitude of 0.5 and two phenotypes (one divergent and one non-divergent), and were run for  
385 20,000 generations.

### focal QTL effect–magnitude variation

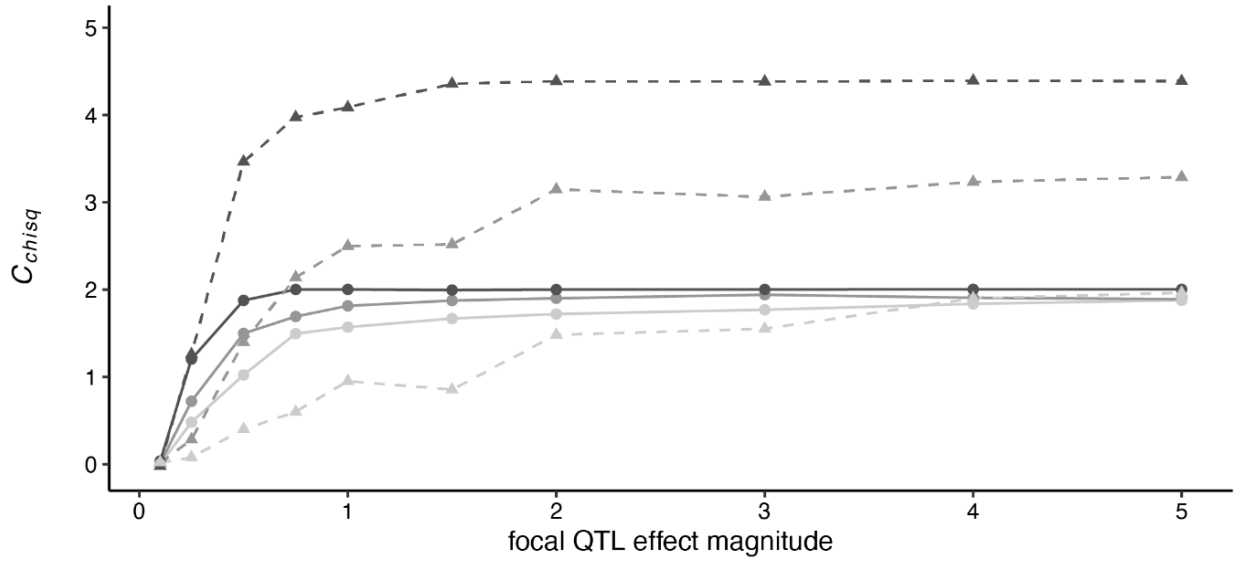

### focal QTL mutational correlation variation

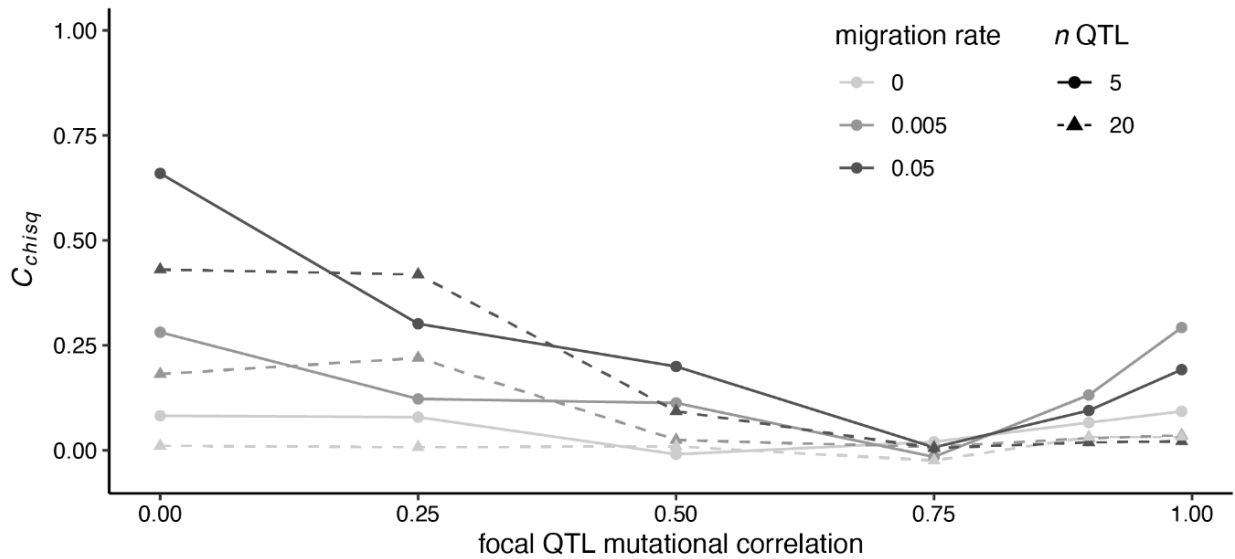

### focal QTL dimensionality reduction

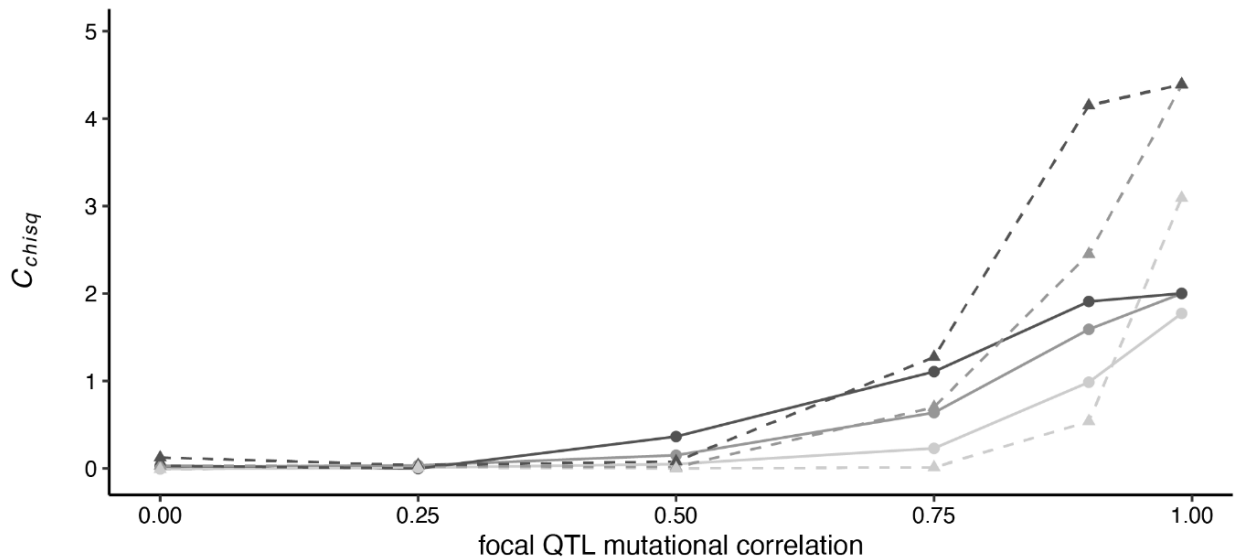

387 **Figure S3.** Effects of increasing the number of QTL modelled from five (solid lines, circle points) to 20  
388 (dashed lines, triangle points). In the top pane we examine effect-magnitude variation at the focal QTL  
389 (as in fig. 2), with mutational correlations for all QTL fixed at 0.5. In the middle pane we examine  
390 mutational correlation variation at the focal QTL (as in fig. 3), with mutational correlations at non-focal  
391 QTL of 0.75 and QTL effect magnitudes at 0.5. In the lower pane we examine a reduction in  
392 dimensionality at the focal locus (as in fig. 4B), where the total number of phenotypes is two and QTL  
393 effect magnitudes are 0.5.
